# Supplementary material for: Bayesian Optimization of Machine Learning Classification of Resting-State EEG Microstates in Schizophrenia: A Proof-of-Concept Preliminary Study Based on Secondary Analysis
Source: MDPI journal article supplement (doi:10.3390/brainsci12111497), 2022-11-04
Supplement: s1 [file s1]

**Table S1.** Bayesian optimization workflow for the training dataset

- 
1. For  $t = 1, 2, \dots$
  2. Maximize acquisition function ( $b$ ) over  $f$  and find the new point as

$$x_t$$

$$x_t = \operatorname{argmax} b(x | \text{DATA}_{1:t-1}) \quad (2)$$

3. Posterior distribution update

$$y_t = f(x_t)$$

$$\text{DATA}_{1:t} = \{\text{DATA}_{1:t-1}, (x_t, y_t)\} \quad (3)$$

4. End For.
-

**Table S2.** Hyperparameters of best-fitted ML models based on the importance score of the microstate features.

| Number of microstate features | Best-fitted model | Model parameters                                  |
|-------------------------------|-------------------|---------------------------------------------------|
| 1                             | SVM               | Kernel [Gaussian], Scale [0.017]                  |
| 2                             | Ensemble          | Method [ LogitBoost], Num of cycles trained [300] |
| 3                             | SVM               | Kernel [Gaussian], Scale [0.680]                  |
| 4                             | Tree              | Number of nodes [105]                             |
| 5                             | Ensemble          | Method [ LogitBoost], Num of cycles trained [300] |
| 6                             | Ensemble          | Method [ LogitBoost], Num of cycles trained [299] |
| 7                             | Ensemble          | Method [ LogitBoost], Num of cycles trained [218] |
| 8                             | Ensemble          | Method [ LogitBoost], Num of cycles trained [299] |
| 9                             | Ensemble          | Method [ LogitBoost], Num of cycles trained [200] |
| 10                            | Ensemble          | Method [ LogitBoost], Num of cycles trained [299] |
| 11                            | Ensemble          | Method [ LogitBoost], Num of cycles trained [299] |
| 12                            | Ensemble          | Method [ LogitBoost], Num of cycles trained [238] |
| 13                            | Ensemble          | Method [ LogitBoost], Num of cycles trained [204] |
| 14                            | Ensemble          | Method [ LogitBoost], Num of cycles trained [299] |
| 15                            | Ensemble          | Method [ LogitBoost], Num of cycles trained [299] |
| 16                            | Ensemble          | Method [ LogitBoost], Num of cycles trained [202] |
| 17                            | Ensemble          | Method [ LogitBoost], Num of cycles trained [298] |
| 18                            | Ensemble          | Method [ LogitBoost], Num of cycles trained [226] |
| 19                            | SVM               | Kernel [Gaussian], Scale [74.76]                  |
| 20                            | Ensemble          | Method [ LogitBoost], Num of cycles trained [229] |

**Table S3.** Output measures of the subject-independent best-fitted ML models.

| Leave out subject            |                   | Output measures |                 |         |      | Model parameters                                         |
|------------------------------|-------------------|-----------------|-----------------|---------|------|----------------------------------------------------------|
| EEG segments [Test set data] | Best-fitted model | Sensitivity (%) | Specificity (%) | Acc (%) | AUC  |                                                          |
| HC[S1],SZ[S1]                | Ensemble          | 76.97           | 95.16           | 84.44   | 0.86 | Method [ LogitBoost], Num of cycles trained [298]        |
| HC[S2],SZ[S2]                | Ensemble          | 90.23           | 91.53           | 90.88   | 0.91 | Method [ LogitBoost], Num of cycles trained [237]        |
| HC[S3],SZ[S3]                | Neural network    | 81.82           | 100.00          | 90.09   | 0.91 | Method [net], Activations [relu], Layer sizes [241,70,3] |
| HC[S4],SZ[S4]                | Ensemble          | 86.67           | 88.95           | 87.89   | 0.88 | Method [ LogitBoost], Num of cycles trained [242]        |
| HC[S5],SZ[S5]                | Neural network    | 93.18           | 94.37           | 93.71   | 0.94 | Method [net], Activations [relu], Layer sizes [253,31,7] |

|                 |                |                  |                  |                  |                  |                                                          |
|-----------------|----------------|------------------|------------------|------------------|------------------|----------------------------------------------------------|
| HC[S6],SZ[S6]   | Ensemble       | 94.05            | 83.61            | 89.90            | 0.89             | Method [ LogitBoost], Num of cycles trained [285]        |
| HC[S7],SZ[S7]   | Ensemble       | 96.57            | 75.45            | 84.81            | 0.86             | Method [ LogitBoost], Num of cycles trained [275]        |
| HC[S8],SZ[S8]   | Neural network | 83.54            | 88.65            | 85.90            | 0.86             | Method [net], Activations [tanh], Layer sizes [181,52,7] |
| HC[S9],SZ[S9]   | SVM            | 95.35            | 95.14            | 95.24            | 0.95             | Kernel [Gaussian], Scale [2.47]                          |
| HC[S10],SZ[S10] | Neural network | 94.42            | 98.54            | 95.95            | 0.96             | Method [net], Activations [relu], Layer sizes [61,4,3]   |
| HC[S11],SZ[S11] | SVM            | 100.00           | 92.52            | 95.99            | 0.96             | Kernel [Gaussian], Scale [5.48]                          |
| HC[S12],SZ[S12] | SVM            | 95.83            | 96.30            | 96.08            | 0.96             | Kernel [Gaussian], Scale [2.17]                          |
| HC[S13],SZ[S13] | Ensemble       | 97.75            | 89.39            | 93.56            | 0.94             | Method [ LogitBoost], Num of cycles trained [294]        |
| HC[S14],SZ[S14] | Neural network | 95.05            | 86.92            | 89.73            | 0.91             | Method [net], Activations [relu], Layer sizes [87,17,48] |
| Mean $\pm$ SD   |                | 91.53 $\pm$ 6.76 | 91.18 $\pm$ 6.44 | 91.01 $\pm$ 4.18 | 0.91 $\pm$ 0.038 | Suggested models [ Ensemble, SVM, and Neural network]    |
