# Supplementary material for: Bayesian Optimization of Machine Learning Classification of Resting-State EEG Microstates in Schizophrenia: A Proof-of-Concept Preliminary Study Based on Secondary Analysis
Source: Brain Sci. 2022 Nov 4;12(11):1497. doi: 10.3390/brainsci12111497 (PMC9688063; doi:10.3390/brainsci12111497)
Supplement: Supplementary file 1 [file brainsci-12-01497-s001.zip]

Archive with 8 entries (8 files):
- Figure S1.tiff
- Figure S2.tiff
- Figure S3.tiff
- Figure S4.tiff
- Figure S5.tiff
- Figure S6.tiff
- Figure S7.tiff
- SupplementaryTables.pdf
